# Supplementary figures and images for: The stepwise specification of embryonic stem cells to hematopoietic fate is driven by sequential exposure to Bmp4, activin A, bFGF and VEGF
Source: Oxford University Press journal article supplement (doi:10.1242/dev.011767), 2008-03-14

**A**

Embryo E7.25

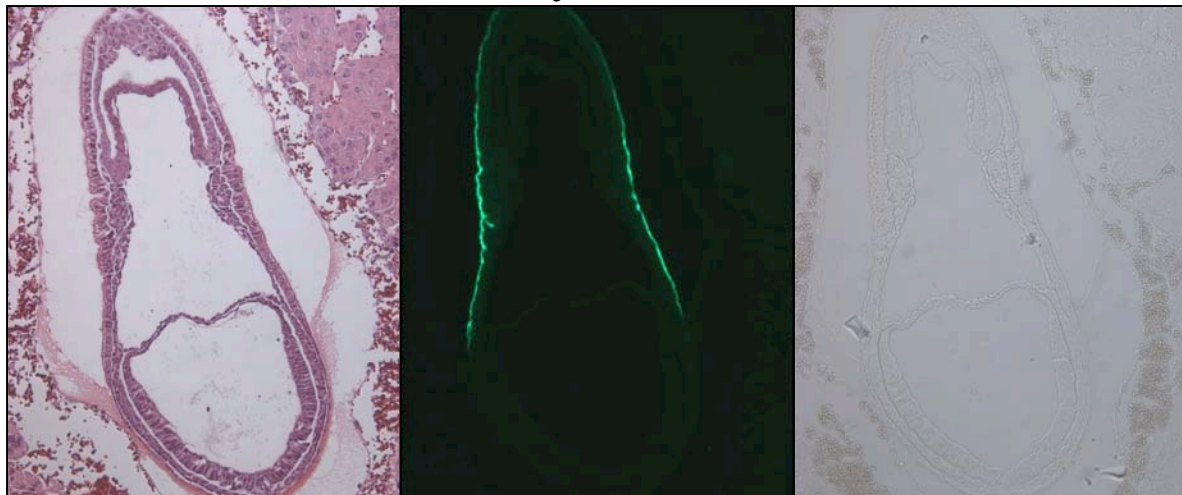**B**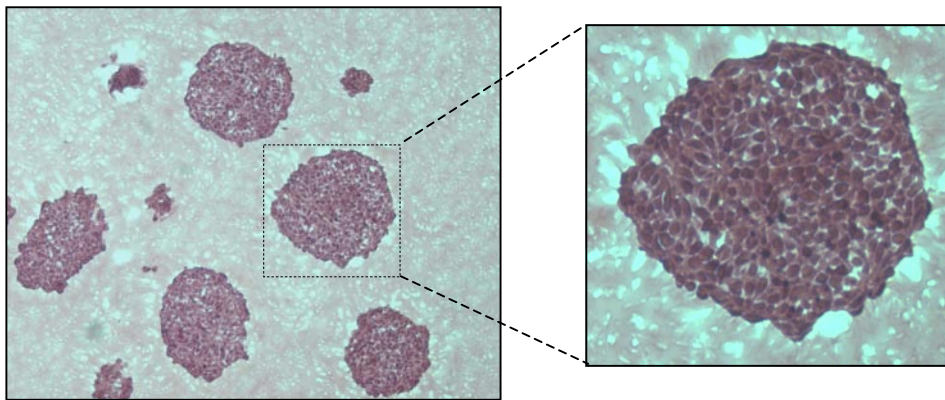**C**

EBs day2

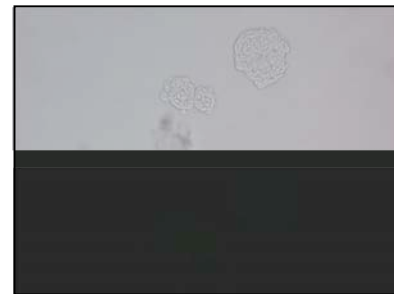**D**

EBs day3

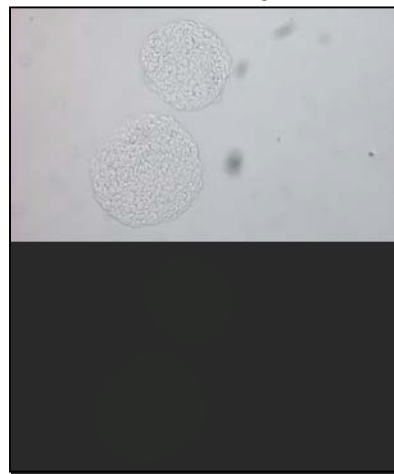

Supplement: dev011767-sup-011767-figs5.pdf [file dev011767-sup-011767-figs5.pdf]
